# Ultrashort Cationic Lipopeptides and Lipopeptoids Selectively Induce Cytokine Production in Macrophages

Brandon Findlay<sup>1</sup>, Neeloffer Mookherjee<sup>2\*</sup>, Frank Schweizer<sup>1,3\*</sup>

**1** Department of Chemistry, University of Manitoba, Winnipeg, Manitoba, Canada, **2** Department of Internal Medicine and Immunology, Manitoba Centre for Proteomics and Systems Biology, University of Manitoba, Winnipeg, Manitoba, Canada, **3** Department of Medical Microbiology, University of Manitoba, Health Sciences Centre, Winnipeg, Manitoba, Canada

## Abstract

A series of ultrashort lipopeptides and lipopeptoids were tested for their ability to induce cytokine production in macrophages. Fourteen compounds were found to strongly induce production of chemokines Gro $\alpha$  and IL-8, with a structural bias that was absent from previous antibacterial activity investigations. Compounds based on LysGlyLys and MlysGlyMlys sequences did not induce cytokine production, whereas those based on LysLysLys and MlysMlysMlys were active only when linked to a lipid tail at least sixteen carbons long. Three lipopeptides induced high levels of IL-8 production, above that of equivalent concentrations of cathelicidin LL-37, while no compound induced production of the pro-inflammatory cytokine TNF- $\alpha$  at or below 100  $\mu$ M. Two compounds, peptoids C16OH-MlysMlysMlys and C16OH-NHarNHarNHar, were selective for IL-8 production and did not induce TNF- $\alpha$  or IL-1 $\beta$ . These compounds may prove beneficial for in vivo treatment of infectious disease, with improved bioavailability over LL-37 due to their protease-resistant scaffold.

**Citation:** Findlay B, Mookherjee N, Schweizer F (2013) Ultrashort Cationic Lipopeptides and Lipopeptoids Selectively Induce Cytokine Production in Macrophages. PLoS ONE 8(2): e54280. doi:10.1371/journal.pone.0054280

**Editor:** Claudio M. Costa-Neto, University of São Paulo, Brazil

**Received:** September 26, 2012; **Accepted:** December 11, 2012; **Published:** February 4, 2013

**Copyright:** © 2013 Findlay et al. This is an open-access article distributed under the terms of the Creative Commons Attribution License, which permits unrestricted use, distribution, and reproduction in any medium, provided the original author and source are credited.

**Funding:** This research was supported by the Natural Sciences and Engineering Research Council of Canada (NSERC) and the Canadian Foundation for Innovation (CFI). The funders had no role in study design, data collection and analysis, decision to publish, or preparation of the manuscript.

**Competing Interests:** The authors have declared that no competing interests exist.

\* E-mail: schweize@cc.umanitoba.ca (FS); mookherj@cc.umanitoba.ca (NM)

## Introduction

It is well established that the prevalence of antibiotic resistance is rising in pathogenic bacteria, in part due to selective pressure from human antibiotic use and from the use of antibiotics as growth promoters in livestock [1,2]. Efforts to develop new antibiotics and antibiotic scaffolds have met with mixed success, due to reduced industry investment and a number of complications arising from high-throughput screening of bacterial targets [3]. The urgent need for new antibiotics has driven research into new scaffolds and unconventional modes of action, with the field of cationic antimicrobial peptides (CAMPs) of particular interest [4]. First isolated from amphibians like *Xenopus laevis* [5], CAMPs are a rich class of structurally diverse antimicrobials found throughout the plant and animal kingdoms. Unlike classical antibiotics, which derive their activity through inhibition of specific enzymes or processes, CAMPs largely interact with the cell through non-specific interactions driven by a mix of electrostatic and hydrophobic effects [6]. Early researchers were particularly interested in the effect of CAMPs on bacterial and mammalian membranes, as many compounds were found to form membrane pores at sufficiently high concentrations and it was thought that a membrane-specific mode of action had reduced potential for resistance development [7,8].

These initial investigations into pore formation eventually led to a more nuanced view of CAMPs [9]. Examining CAMPs with high levels of antibacterial activity and low mammalian toxicity revealed that at their minimal inhibitory concentration (MIC) they were interfering with either internal cellular processes or

membrane proteins, not predominantly with the bacterial membrane [4,10]. As efforts to optimize the more membrane-active peptides have been stymied by these peptides' ability to disrupt or lyse eukaryotic cells at concentrations generally only slightly above that of bacterial membranes [11], much of the research in recent years has focused on understanding the interaction between CAMPs and their non-membrane targets [4,12,13].

The human cathelicidin LL-37 has been a subject of particular interest, due to its widespread expression in human immune and epithelial cells. First discovered through its LPS binding ability [14], LL-37 is strongly antibacterial *in vitro* but has little antibacterial activity under physiological conditions [15]. Instead, LL-37 appears to exert its antibacterial effect through modulation of the immune system [16,17]. Consistent with this, altered LL-37 expression has been linked to both auto-immune disorders and increased susceptibility to bacterial infection [18]. LL-37 promotes wound healing [18], recruits leukocytes to the site of infection by acting as a direct chemoattractant or by inducing chemokine production, activates local dendritic cells and T-cells for clearing of invasive bacteria, and exhibits selective anti-inflammatory effects [17]. Modification of another immunomodulatory peptide, the bovine battenacin, created IDR1, which has protective effects in a mouse infection model, despite lacking direct antibacterial activity [4,19]. Further library screening of battenacin derivatives led to the more active IDR-1002 [20], while a proprietary compound, the pentapeptide IMX942, is currently entering phase 2 clinical trials [21].

To date, research into the immunomodulatory properties of CAMPs has focused on analogues of natural host defence peptides (HDPs), paring down the length of the peptide to reduce production costs while retaining a modified subsection for receptor binding [19]. As natural immunomodulators like LL-37 act in part through low-affinity binding to chemotaxis receptor FPRL1 and to several intracellular receptors [22,23], we hypothesized that compounds which mimic the physicochemical properties but not the sequence of HDPs may demonstrate improved activity, while allowing for incorporation of a protease-resistant scaffold. Protease resistance was desirable, as bacterial resistance to LL-37 can be readily conferred by metalloprotease secretion, increasing virulence [24]. Recent reports confirmed this early hypothesis [25], demonstrating that protease-resistant synthetic mimics of antibacterial peptides based on a cationic arylether scaffold cause immunomodulatory responses.

Previous work by us and others has shown that for ultrashort lipopeptides and lipopeptoids only three amino acid residues and a hydrophobic lipid tail is required for efficient killing of a wide variety of bacteria *in vitro*. [26–28] Antibacterial activity was related to both peptidic sequence and length of the hydrophobic tail, with our most active lipopeptides and lipopeptoids unfortunately demonstrating significant toxicity towards mammalian red blood cells at slightly above their effective antibacterial concentrations. In lipopeptides this toxicity could be sharply reduced by adding a polar hydroxyl group to the terminus of the lipid tail [27], but these amphiphiles had little antibacterial activity.

With their large lipid tail ultrashort lipopeptides bear little similarity to known HDPs, and have shorter peptide sequences than the innate defence regulator peptides currently in clinical development. Like LL-37, *in vitro* they disrupt the bacterial membrane [26,29], and we hypothesized that they could also modulate the immune system. As achiral molecules the lipopeptoids are further from the structure of current innate defence regulator peptides, but their naturally protease-resistant backbone offers several key advantages (*vide supra*) [30]. The purpose of this study was to assess the ability of a series of ultrashort lipopeptides and lipopeptoids to induce production of chemokines Gro $\alpha$  and IL-8 in human macrophage-like THP-1 cells. Macrophage-like THP-1 cells elicit cellular responses similar to peripheral blood-derived mononuclear cells in the presence of host defence peptides [31,32], while Gro $\alpha$  and IL-8 play a critical role in leukocyte recruitment to the site of infections, enhancing bacterial clearance [33]. We further screened active compounds for the production of pro-inflammatory cytokines TNF- $\alpha$  and IL-1 $\beta$ . Compounds which selectively induce chemokine production without inducing pro-inflammatory cytokine TNF- $\alpha$  may be useful in antibacterial therapy.

## Results and Discussion

To display antibacterial activity lipopeptides and lipopeptoids require an overall cationic charge and long lipid tail, for attraction to the negatively charged bacterial outer membrane and insertion into the hydrophobic membrane core [26]. Our compound synthesis was biased towards these properties (General Chemical Procedures, Supplementary Materials), with LysGlyLys or LysLysLys based amphiphiles (MLysGly,MLys and MLys,MLys,MLys for the lipopeptoids) and lipid tails eleven to twenty carbons in length (Figure 1, Table 1, Table S1). Aware of the potential cytotoxicity of amphiphiles with large hydrophobic tails, a terminal hydroxy group was added to the C16 tails to disturb the classic amphiphilic nature of lipopeptides **6** and **10** and lipopeptoids **17** and **20**. Increasing the strength of the cationic charge has been found to

improve antibacterial activity [28], and so each of the LysLysLys and MLys,MLys,MLys compounds was mirrored by a homoarginine analogue (Har or MHar), to determine if immunomodulatory properties would be similarly enhanced. Amphiphile selection was roughly divided between lipopeptides and lipopeptoids, to assess the impact of chirality and conformation on activity.

Prior to testing, human monocytic THP-1 cells were differentiated to plastic-adherent macrophage-like THP-1 cells as previously described [31]. The cells were rested for twenty-four hours, then exposed to the amphiphiles of interest for twenty-four hours. Cell free TC supernatants were monitored for the production of chemokines Gro $\alpha$  and IL-8 by ELISA as previously described [31,34]. The constitutive background level of chemokine Gro $\alpha$  was  $6.6 \pm 1.8$  pg/ml, and that of IL-8 was  $1.7 \pm 0.16$  ng/ml. Encouragingly, the majority of compounds were strong inducers of both IL-8 and Gro $\alpha$  and increased chemokine levels above background (Figure 2). The lipopeptides (**1–11**) were more active than their corresponding lipopeptoids (**12–21**), despite little difference in cytotoxic behaviour. The three amphiphiles with a LysLysLys peptide sequence and lipid tail at least sixteen carbons in length, **5–7**, were especially strong inducers of IL-8, increasing the concentration to 5–8 ng/mL ( $p < 0.05$ ) above control at 10  $\mu$ M of lipopeptide, and up to 13 ng/mL ( $p < 0.01$ ) above control at 50  $\mu$ M (Figure 2). These amphiphiles compared favourably to LL-37 (1.3 ng/mL of IL-8 above control at 10  $\mu$ M), despite their brief peptide sequence. This activity was not shared by the LysGlyLys lipopeptides **2** and **3**, which failed to significantly increase IL-8 production at any of the concentrations tested. Guanidinylation did not improve IL-8 production at low lipopeptide concentrations, though amphiphiles **10–11** did induce up to 10 ng/mL ( $p < 0.05$ ) of IL-8 at 50  $\mu$ M, suggesting a minimum lipopeptide concentration is required for IL-8 production. All lipopeptides with lipid tails shorter than sixteen carbons were unable to induce either IL-8 or Gro $\alpha$  at concentrations up to 100  $\mu$ M (Figure 2, Figure S1).

The lipopeptides were less effective at inducing Gro $\alpha$  production, though 50  $\mu$ M of amphiphile **6** compared favourably to 2.5  $\mu$ M of LL-37 (670 pg/mL vs 800 pg/mL, respectively). Lipopeptoid **21** was the strongest inducer of Gro $\alpha$  among our amphiphiles, causing  $996 \pm 4$  pg/mL ( $p = 0.003$ ) of Gro $\alpha$  production at 50  $\mu$ M (Figure 2). This peptoid is composed of a twenty carbon lipid tail and MHar/MHar/MHar sequence, and along with most of the lipopeptoids tested induced  $6 \pm 0.8$  ng/mL ( $p < 0.05$ ) of IL-8 at 50 and 100  $\mu$ M amphiphile concentrations. The high level of Gro $\alpha$  production at 50  $\mu$ M did not extend from similar productions at lower concentrations, with peptoids **15–17** significantly weaker than amphiphiles **5–7** at 5  $\mu$ M and 10  $\mu$ M. Similar to the results with the lipopeptides, only lipopeptoids based on the MLys,MLys,MLys sequence (**14–21**) were able to induce IL-8 or Gro $\alpha$  production; MLysGly,MLys peptoids **12** and **13** were inactive.

Chemokine production by the lipopeptides and lipopeptoids was largely unaffected by disrupting the hydrophobic nature of the lipid tail with a terminal alcohol moiety. Little difference was observed between C16-LysLysLys (**5**) and C16OH-LysLysLys (**6**) at low concentrations, and amphiphile **6** led to the highest IL-8 production ( $12.5 \pm 0.5$  ng/ml,  $p = 0.006$ ) at high amphiphile concentration (50  $\mu$ M). This is in contrast to antibacterial activity, which has been found to be sharply reduced by the presence of a terminal alcohol function [27]. As the antimicrobial activity of lipopeptides is mediated through non-specific membrane interactions [26], this discrepancy suggests that chemokine induction by our compounds is independent of membrane binding.

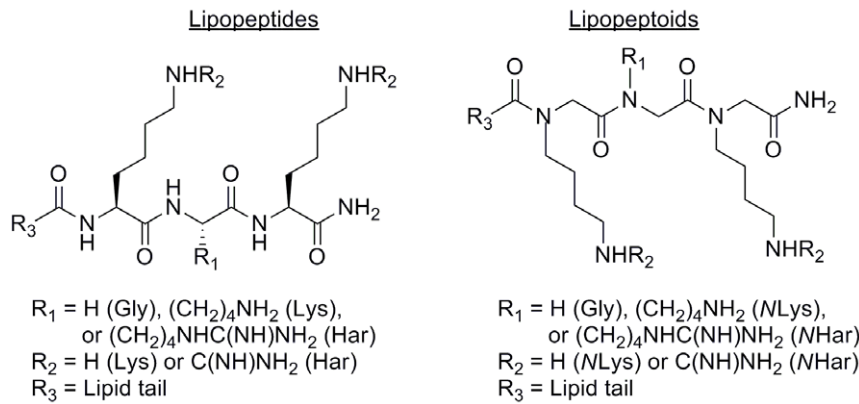

**Figure 1. Structures for the cationic amphiphiles used in this study.** Har = homoarginine; NLys = lysine peptoid; NHar = homoarginine peptoid.

doi:10.1371/journal.pone.0054280.g001

This is further supported by the lack of activity of amphiphiles **1–3** in contrast to **5–7**. At a concentration of 50  $\mu\text{M}$ , C16-LysGlyLys (**1**) induced 0.2 ng/mL production of IL-8 above control values, while C16-LysLysLys (**5**) increased IL-8 production to  $7.7 \pm 0.6$  ng/mL,  $p = 0.02$  (Figure 2), despite comparable antibacterial activities against both Gram negative and Gram positive bacteria [27]. The significant loss in cytokine production observed between low concentrations of lipopeptides containing LysLysLys and HarHarHar sequences (compounds **5–7** and **9–11**, respectively) also suggests a sequence specific effect, though with the lipopeptoids this difference was not observed.

In contrast, cytotoxicity of the amphiphiles was independent of the peptidic sequence and correlated well with previously published antimicrobial activities and with lipid tail length (Figure 2, Table S2) [27,28]. At high concentrations the amphiphiles appear able to disrupt the cellular membrane of macrophage-like cells, as cytotoxicity was evaluated through the release of the cytosol-localized protein lactate dehydrogenase (LDH). Our amphiphiles were broadly non-toxic at 5  $\mu\text{M}$  and 10  $\mu\text{M}$ , though the majority caused greater than 15% cytotoxicity at 100  $\mu\text{M}$ ; with amphiphiles **3**, **7**, **11** and **21** equally toxic at 50  $\mu\text{M}$ . The high toxicity of amphiphile **21** may limit chemokine

induction at high concentrations, explaining the sharp decrease in Gro $\alpha$  production as peptoid concentration increases from 50  $\mu\text{M}$  to 100  $\mu\text{M}$  (1000 pg/mL vs 200 pg/mL).

Encouraged by the ability of our amphiphiles to induce chemokines Gro $\alpha$  and IL-8, we examined the effect of the active amphiphiles on production of pro-inflammatory cytokines IL-1 $\beta$  and TNF- $\alpha$ . Binding of microbial lipopeptides Pam<sub>3</sub>CSK<sub>4</sub> and MALP-2 to TLRs strongly induces the production of pro-inflammatory cytokines TNF- $\alpha$  and IL-1 $\beta$ , among others [35]. Both of these bacterial lipopeptides have multiple lipid tails (three and two, respectively), but synthetic analogues with only a single lipid tail have recently been produced [36], suggesting that the activity of amphiphiles **1–21** may stem from binding to TLRs [37]. Pro-inflammatory cytokines help combat infection, but inappropriate or amplified induction of these cytokines – especially TNF- $\alpha$  – leads to chronic inflammatory disorders such as rheumatoid arthritis, inflammatory bowel disease and psoriasis [38], reducing the utility of inflammatory compounds in infectious disease therapy.

In contrast to the previously published non-proteogenic immunomodulators [25], none of our compounds induced TNF- $\alpha$  production at any of the concentrations tested (Figure S2), suggesting that the immunomodulatory activity of our compounds is not mediated by engagement of innate immune receptors such as TLRs. However, low concentrations of **5–7** (10  $\mu\text{M}$ ) were able to induce up to 25 pg/mL ( $p < 0.06$ ) of IL-1 $\beta$  (Figure 3). Moving from 10  $\mu\text{M}$  to 50  $\mu\text{M}$  of **7** increased the observed IL-1 $\beta$  concentration over forty-fold ( $p = 0.01$ ), suggesting a threshold peptide concentration was required for strong induction of IL-1 $\beta$ . It was previously demonstrated that the natural HDP LL-37, but not synthetic peptide IDR-1, acts synergistically with IL-1 $\beta$  to induce the chemokine IL-8 [31]. Induction of IL-1 $\beta$  may contribute in part to the high induction of IL-8 observed with our lipopeptides, as the spike in IL-1 $\beta$  production occurs over the same concentration as the increase in IL-8 production by amphiphiles **9–11** and **21**.

## Conclusion

We have shown that ultrashort lipopeptides and lipopeptoids are able to induce selective cytokine production in human macrophages, despite little structural similarity to any known host defence peptide or CAMP. A lipid tail at least sixteen carbons long was required for activity, though the immunomodulatory effect of these compounds does not appear to be related to their effects on

**Table 1. Cationic amphiphiles in this study.**

|    | Lipopeptides <sup>a</sup>       | Lipopeptoids <sup>a</sup>             |
|----|---------------------------------|---------------------------------------|
| 1  | C16-LysGlyLys-NH <sub>2</sub>   | 12 C11-NLysGlyNLys-NH <sub>2</sub>    |
| 2  | C16OH-LysGlyLys-NH <sub>2</sub> | 13 C16-NLysGlyNLys-NH <sub>2</sub>    |
| 3  | C20-LysGlyLys-NH <sub>2</sub>   | 14 C11-NLysNLysNLys-NH <sub>2</sub>   |
| 4  | C11-LysLysLys-NH <sub>2</sub>   | 15 C16-NLysNLysNLys-NH <sub>2</sub>   |
| 5  | C16-LysLysLys-NH <sub>2</sub>   | 16 C16OH-NLysNLysNLys-NH <sub>2</sub> |
| 6  | C16OH-LysLysLys-NH <sub>2</sub> | 17 C20-NLysNLysNLys-NH <sub>2</sub>   |
| 7  | C20-LysLysLys-NH <sub>2</sub>   | 18 C11-NHarNHarNHar-NH <sub>2</sub>   |
| 8  | C11-HarHarHar-NH <sub>2</sub>   | 19 C16-NHarNHarNHar-NH <sub>2</sub>   |
| 9  | C16-HarHarHar-NH <sub>2</sub>   | 20 C16OH-NHarNHarNHar-NH <sub>2</sub> |
| 10 | C16OH-HarHarHar-NH <sub>2</sub> | 21 C20-NHarNHarNHar-NH <sub>2</sub>   |
| 11 | C20-HarHarHar-NH <sub>2</sub>   | LL-37 <sup>b</sup>                    |

<sup>a</sup>Trifluoroacetate salt;

<sup>b</sup>LLGDFFRKSKEKIGKEFKRIVQRIKDFLRNLPRTES-OH.

doi:10.1371/journal.pone.0054280.t001

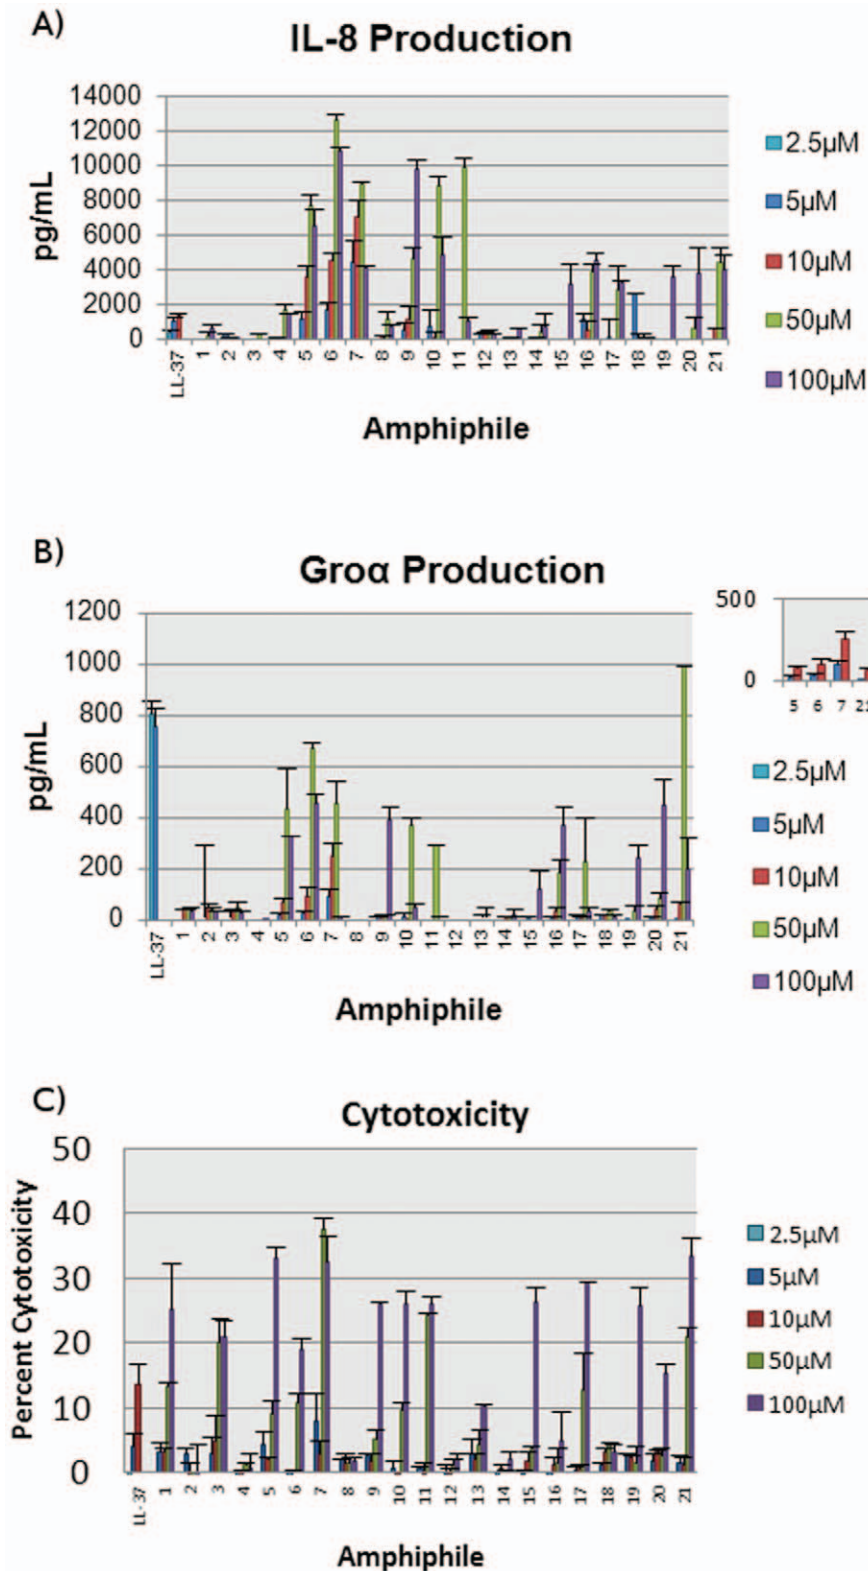

**Figure 2. Cytokine production and LDH release by human macrophage-like THP-1 cells following incubation with amphiphiles 1–21.** A) IL-8 production. TC supernatants were monitored for IL-8 production by ELISA, and results were recorded in pg/mL. B) Gro $\alpha$  production, in pg/mL. Inset: Expanded values for amphiphiles 5–7 and 21 at 5  $\mu$ M and 10  $\mu$ M. C) Cytotoxicity following incubation with amphiphiles 1–21. TC supernatants were monitored for LDH release as a measure of cellular toxicity, and results shown represent percent cytotoxicity over un-stimulated cells. All studies were performed in two independent biological replicates with two technical replicate each, with the data here presented as the mean plus standard error of the mean (sem) and with LL-37 data included as a positive control. doi:10.1371/journal.pone.0054280.g002

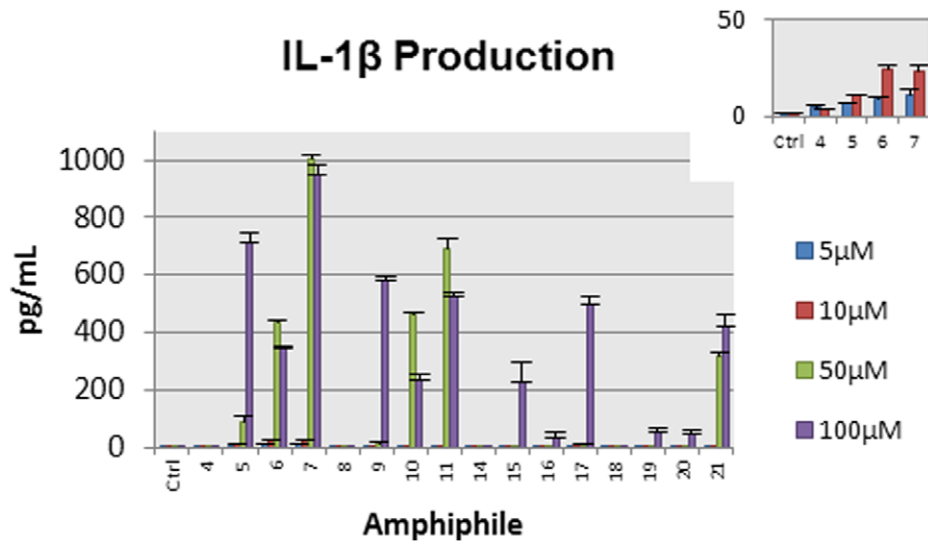

**Figure 3. IL-1 $\beta$  production.** Human macrophage-like THP-1 cells were exposed to amphiphiles 4–11 and 14–21, for twenty-four hours. TC supernatants were monitored for IL-1 $\beta$  by ELISA, with results shown in pg/mL. Studies were performed in two independent biological replicates with two technical replicate each, with the data here presented as the mean plus sem. Inset: Expanded results for the negative control and amphiphiles 4–7 at 5  $\mu$ M and 10  $\mu$ M.

doi:10.1371/journal.pone.0054280.g003

the bacterial membrane. Compounds with no appreciable antibacterial activity (MIC  $\geq$ 128  $\mu$ g/mL) were able to strongly induce the production of chemokines IL-8 and Gro $\alpha$  at sub-cytotoxic concentrations, though the strongest inducer of Gro $\alpha$ , C20-MHar/MHar/MHar (21), also has moderate antibacterial activity *in vitro* (MIC  $\leq$ 16  $\mu$ g/mL, Gram positive strains) [28].

The LysLysLys series of peptides induced the greatest IL-8 production, even above that of LL-37. However, these compounds also caused a moderate amount of IL-1 $\beta$  production at the same concentration (10  $\mu$ M, 25 pg/mL). Lipopeptoids were in general less active, though the peptoid C20-MHar/MHar/MHar was the strongest inducer of Gro $\alpha$ , and a moderate inducer of IL-8. High concentrations of amphiphiles can result in IL-1 $\beta$  production, which may be synergistic in inducing the chemokine IL-8 [31,39]. None of the compounds induced TNF- $\alpha$  at any concentration tested, suggesting that cytokine production is not mediated by binding to TLR1:TLR2 or TLR6:TLR2 heterodimers [35]. The exact mode of action for these amphiphiles is unknown, though at least two different cytokine expression profiles were observed. The lipopeptoids C16OH-MLys/MLys/MLys (16) and C16OH-MHar/MHar/MHar (20) were of particular interest, as they were moderate inducers of Gro $\alpha$  and IL-8 but did not induce either IL-1 $\beta$  or TNF- $\alpha$  production. These compounds are naturally protease resistant, and may be appealing leads for further discovery of highly selective immunomodulation-based infectious disease therapeutics.

## Materials and Methods

### Chemical Synthesis

Lipopeptides and lipopeptoids were prepared according to previously established techniques [26–28]. In brief, peptides were synthesized as C-terminal amides on Rink amide MBHA resin, using 9-fluorenylmethoxycarbonyl/t-butylcarbamate (Fmoc/Boc) chemistry. Amino acids were coupled to the resin with O-(Benzotriazol-1-yl)-N,N,N',N'-tetramethyluronium tetrafluoroborate (TBTU) activation in dimethylformamide (DMF), with the lysine R-groups protected via Boc. Lipid tails were also added with

TBTU, and the completed peptides were cleaved from the resin with trifluoroacetic acid (TFA). Peptides were purified via passage through C18-functionalized silica at 3 PSI. Lipopeptoids were also prepared on Rink amide MBHA resin. Bromoacetic acid was added to the growing chain after activation with diisopropylcarbodiimide (DIC), and the alkyl bromine atom was then displaced by tert-butyl 4-aminobutylcarbamate in N-methyl-2-pyrrolidinone (NMP). Lipid tails were attached via activation with TBTU in DMF, and cleavage and subsequent purification were effected similar to the lipopeptides. Guanidinylation was the result of treatment of the lipopeptides and lipopeptoids with N,N-diBoc-N-triflylguanidine and subsequent deprotection with TFA [40]. For further details on the chemical synthesis please see the Supporting Information.

### Cytokine Measurements and Cytotoxicity

Human monocytic THP-1 (ATCC<sup>®</sup> TIB-202) cells were cultured in RPMI-1640 medium containing 2 mM L-glutamine, 1 mM sodium pyruvate, supplemented with 10% (v/v) FBS and maintained in a humidified incubator at 37°C and 5% CO<sub>2</sub> as previously described [31]. The cells were differentiated into plastic adherent macrophage-like cells with phorbol 12-myristate 13-acetate (Sigma-Aldrich) and rested for an additional 24 before stimulations as previously described [31]. Macrophage-like THP-1 cells were stimulated with the different compounds for 24 hr. TC supernatants were centrifuged at 1500 $\times$ g for 5–7 min to obtain cell-free samples and aliquots were stored at –20°C until further use. Cellular cytotoxicity was evaluated by monitoring the release of lactate dehydrogenase employing a colorimetric detection kit (Roche Diagnostics). Production of chemokines Gro $\alpha$  and IL-8 were monitored in the TC supernatants by ELISA employing human DuoSet (R&D Systems Inc.) as per the manufacturer's instructions. Production of pro-inflammatory cytokines TNF- $\alpha$  and IL-1 $\beta$  were monitored in the TC supernatants using specific antibody pairs from eBioscience, Inc., as per the manufacturer's instructions. The concentration of the cytokines or chemokines in the TC supernatants was evaluated by establishing a standard



curve with serial dilutions of the recombinant human cytokines or chemokines [31].

### Statistical Analysis

ELISA results were obtained from two biological replicates with two technical replicates each and statistical analyses was performed using Student paired t-test. Error bars in the graphs represents standard error of the mean, and a p-value of less than 0.05 was considered to be statistically significant.

### Supporting Information

**Figure S1** Immunological properties of the compounds presented in table S1. Human macrophage-like THP-1 cells were exposed to amphiphiles **S1–S7** for twenty-four hours. TC supernatants were monitored for A) IL-8 production and B) Gro- $\alpha$  production by ELISA. IL-8 production is shown after subtraction of constitutive background levels found in un-stimulated control cell. C) LDH release was monitored in the TC supernatants as an indicator of cellular cytotoxicity. Results shown represent percent cytotoxicity over un-stimulated cells. Studies were performed in two independent biological replicates with two technical replicate each, with the data here presented as the mean plus standard error of the mean (sem).

(TIFF)

### References

- Tadesse DA, Zhao S, Tong E, Ayers S, Singh A, et al. (2012) Antimicrobial drug resistance in *Escherichia coli* from humans and food animals, United States, 1950–2002. *Emerging Infectious Diseases* 18: 741–749.
- Hammerum AM, Heuer OE, Emborg HD, Bagger-Skjot L, Jensen VF, et al. (2007) Danish integrated antimicrobial resistance monitoring and research program. *Emerging Infectious Diseases* 13: 1632–1639.
- Payne DJ, Gwynn MN, Holmes DJ, Pompliano DL (2007) Drugs for bad bugs: Confronting the challenges of antibacterial discovery. *Nature Reviews Drug Discovery* 6: 29–40.
- Yeung AT, Gellatly SL, Hancock RE (2011) Multifunctional cationic host defence peptides and their clinical applications. *Cellular and Molecular Life Sciences* : CMLS 68: 2161–2176.
- Zaslouf M (1987) Magainins, a class of antimicrobial peptides from xenopus skin: Isolation, characterization of two active forms, and partial cDNA sequence of a precursor. *Proceedings of the National Academy of Sciences of the United States of America* 84: 5449–5453.
- Khandelia H, Ipsen JH, Mouritsen OG (2008) The impact of peptides on lipid membranes. *Biochimica et Biophysica Acta* 1778: 1528–1536.
- Yang L, Gordon VD, Trinkle DR, Schmidt NW, Davis MA, et al. (2008) Mechanism of a prototypical synthetic membrane-active antimicrobial: Efficient hole-punching via interaction with negative intrinsic curvature lipids. *Proceedings of the National Academy of Sciences of the United States of America* 105: 20595–20600.
- Ge Y, MacDonald DL, Holroyd KJ, Thomsberry C, Wexler H, et al. (1999) In vitro antibacterial properties of pexiganan, an analog of magainin. *Antimicrobial Agents and Chemotherapy* 43: 782–788.
- Brogden KA (2005) Antimicrobial peptides: Pore formers or metabolic inhibitors in bacteria? *Nature Reviews Microbiology* 3: 238–250.
- Srinivas N, Jetter P, Ueberbacher BJ, Werneburg M, Zerbe K, et al. (2010) Peptidomimetic antibiotics target outer-membrane biogenesis in *Pseudomonas aeruginosa*. *Science (New York, N.Y.)* 327: 1010–1013.
- Findlay B, Zhanel GG, Schweizer F (2010) Cationic amphiphiles, a new generation of antimicrobials inspired by the natural antimicrobial peptide scaffold. *Antimicrobial Agents and Chemotherapy* 54: 4049–4058.
- Kaoud TS, Mitra S, Lee S, Taliaferro J, Cantrell M, et al. (2011) Development of JNK2-selective peptide inhibitors that inhibit breast cancer cell migration. *ACS Chemical Biology* 6: 658–666.
- Czihal P, Knappe D, Fritsche S, Zahn M, Berthold N, et al. (2012) Api88 is a novel antibacterial designer peptide to treat systemic infections with multidrug-resistant gram-negative pathogens. *ACS Chemical Biology* 7: 1281–1291.
- Larrick JW, Hirata M, Balint RF, Lee J, Zhong J, et al. (1995) Human CAP18: A novel antimicrobial lipopolysaccharide-binding protein. *Infection and Immunity* 63: 1291–1297.
- Bowdish DM, Davidson DJ, Lau YE, Lee K, Scott MG, et al. (2005) Impact of LL-37 on anti-infective immunity. *Journal of Leukocyte Biology* 77: 451–459.
- Larrick JW, Hirata M, Zhong J, Wright SC (1995) Anti-microbial activity of human CAP18 peptides. *Immunotechnology : An International Journal of Immunological Engineering* 1: 65–72.

**Figure S2** TNF- $\alpha$  production by human macrophage-like THP-1 cells following incubation with amphiphiles **1–21**. TC supernatants were monitored for cytokine production via ELISA, and results are reported in pg/mL. All studies were performed in two independent biological replicates with two technical replicates each.

(TIFF)

**Table S1** Compound sequences. Sequence information for seven lipopeptides or lipopeptoids that displayed little to no activity.

(DOCX)

**Table S2** Antimicrobial activity of select amphiphiles, derived from previous research. Information on compounds **4–7** and **21** is presented, with data from previous studies converted into  $\mu$ M.

(DOCX)

### Supporting Information S1

(DOC)

### Author Contributions

Conceived and designed the experiments: FS BF NM. Performed the experiments: BF NM. Analyzed the data: FS BF NM. Contributed reagents/materials/analysis tools: FS NM. Wrote the paper: BF FS NM.

- Choi KY, Mookherjee N (2012) Multiple immune-modulatory functions of cathelicidin host defense peptides. *Frontiers in Immunology* 3: 149.
- Heilborn JD, Nilsson MF, Kratz G, Weber G, Sorensen O, et al. (2003) The cathelicidin anti-microbial peptide LL-37 is involved in re-epithelialization of human skin wounds and is lacking in chronic ulcer epithelium. *The Journal of Investigative Dermatology* 120: 379–389.
- Scott MG, Dullaghan E, Mookherjee N, Glavas N, Waldbrook M, et al. (2007) An anti-infective peptide that selectively modulates the innate immune response. *Nature Biotechnology* 25: 465–472.
- Nijnik A, Madera L, Ma S, Waldbrook M, Elliott MR, et al. (2010) Synthetic cationic peptide IDR-1002 provides protection against bacterial infections through chemokine induction and enhanced leukocyte recruitment. *Journal of Immunology (Baltimore, Md.: 1950)* 184: 2539–2550.
- Hancock RE, Nijnik A, Philpott DJ (2012) Modulating immunity as a therapy for bacterial infections. *Nature Reviews Microbiology* 10: 243–254.
- De Y, Chen Q, Schmidt AP, Anderson GM, Wang JM, et al. (2000) LL-37, the neutrophil granule- and epithelial cell-derived cathelicidin, utilizes formyl peptide receptor-like 1 (FPR1) as a receptor to chemoattract human peripheral blood neutrophils, monocytes, and T cells. *The Journal of Experimental Medicine* 192: 1069–1074.
- Mookherjee N, Lippert DN, Hamill P, Falsafi R, Nijnik A, et al. (2009) Intracellular receptor for human host defense peptide LL-37 in monocytes. *Journal of Immunology (Baltimore, Md.: 1950)* 183: 2688–2696.
- Thwaite JE, Hibbs S, Titball RW, Atkins TP (2006) Proteolytic degradation of human antimicrobial peptide LL-37 by *Bacillus anthracis* may contribute to virulence. *Antimicrobial Agents and Chemotherapy* 50: 2316–2322.
- Thaker HD, Som A, Ayaz F, Lui D, Pan W, et al. (2012) Synthetic mimics of antimicrobial peptides with immunomodulatory responses. *Journal of the American Chemical Society* 134: 11088–11091.
- Makovitzki A, Baram J, Shai Y (2008) Antimicrobial lipopolypeptides composed of palmitoyl di- and tricationic peptides: In vitro and in vivo activities, self-assembly to nanostructures, and a plausible mode of action. *Biochemistry* 47: 10630–10636.
- Findlay B, Zhanel GG, Schweizer F (2012) Investigating the antimicrobial peptide “Window of activity” using cationic lipopeptides with hydrocarbon and fluorinated tails. *Int J Antimicrob Agents* 40: 36–42.
- Findlay B, Szelemej P, Zhanel GG, Schweizer F (2012) Guanidylation and tail effects in cationic antimicrobial lipopeptoids. *PLoS One* 7: e41141.
- Henzler-Wildman KA, Martinez GV, Brown MF, Ramamoorthy A (2004) Perturbation of the hydrophobic core of lipid bilayers by the human antimicrobial peptide LL-37. *Biochemistry* 43: 8459–8469.
- Simon RJ, Kania RS, Zuckermann RN, Huebner VD, Jewell DA, et al. (1992) Peptoids: A modular approach to drug discovery. *Proceedings of the National Academy of Sciences of the United States of America* 89: 9367–9371.
- Mookherjee N, Brown KL, Bowdish DM, Doria S, Falsafi R, et al. (2006) Modulation of the TLR-mediated inflammatory response by the endogenous human host defense peptide LL-37. *Journal of Immunology (Baltimore, Md.: 1950)* 176: 2455–2464.

32. Mookherjee N, Hamill P, Gardy J, Blimkie D, Falsafi R, et al. (2009) Systems biology evaluation of immune responses induced by human host defence peptide LL-37 in mononuclear cells. *Molecular bioSystems* 5: 483–496.
33. Jin T, Xu X, Hereld D (2008) Chemotaxis, chemokine receptors and human disease. *Cytokine* 44: 1–8.
34. Turner-Brannen E, Choi KY, Arsenault R, El-Gabalawy H, Napper S, et al. (2011) Inflammatory cytokines IL-32 and IL-17 have common signaling intermediates despite differential dependence on TNF-receptor 1. *Journal of Immunology* (Baltimore, Md.: 1950) 186: 7127–7135.
35. Kumar H, Kawai T, Akira S (2011) Pathogen recognition by the innate immune system. *International Reviews of Immunology* 30: 16–34.
36. Agnihotri G, Crall BM, Lewis TC, Day TP, Balakrishna R, et al. (2011) Structure-activity relationships in toll-like receptor 2-agonists leading to simplified monoacyl lipopeptides. *Journal of Medicinal Chemistry* 54: 8148–8160.
37. Takeuchi O, Kawai T, Muhlradt PF, Morr M, Radolf JD, et al. (2001) Discrimination of bacterial lipoproteins by toll-like receptor 6. *International Immunology* 13: 933–940.
38. Bradley JR (2008) TNF-mediated inflammatory disease. *The Journal of Pathology* 214: 149–160.
39. Yu J, Mookherjee N, Wee K, Bowdish DM, Pistolic J, et al. (2007) Host defense peptide LL-37, in synergy with inflammatory mediator IL-1beta, augments immune responses by multiple pathways. *Journal of Immunology* (Baltimore, Md.: 1950) 179: 7684–7691.
40. Baker TJ, Luedtke NW, Tor Y, Goodman M (2000) Synthesis and anti-HIV activity of guanidinoglycosides. *The Journal of Organic Chemistry* 65: 9054–9058.
